# Supplementary material for: Band Phosphorus and Sulfur Fertilization as Drivers of Efficient Management of Nitrogen of Maize (Zea mays L.)
Source: MDPI journal article supplement (doi:10.3390/plants11131660), 2022-06-23
Supplement: s1 [file s1]

# Supplementary material

## Band phosphorus and sulfur fertilization as drivers of efficient management of nitrogen of maize (*Zea mays* L.)

Przemysław Barłóg<sup>1\*</sup>, Remigiusz Łukowiak<sup>1</sup> and Lukáš Hlisenik<sup>2</sup>

Department of Agricultural Chemistry and Environmental Biogeochemistry, Poznan  
University of Life Sciences, Wojska Polskiego 71F, 60-625 Poznan, Poland;  
remigiusz.lukowiak@up.poznan.pl (R.Ł.)

<sup>2</sup> Department of Nutrition Management, Crop Research Institute, Drnovská 507, CZ-161  
01 Prague 6, Ruzyně, the Czech Republic; lhlisenik@vurv.cz (L.H.)

\* Correspondence: przemyslaw.barlog@up.poznan.pl; Tel.: +48-618-48-77-88 (P.B.)

**Treatments of NP(S) fertilization were as follows:** P<sub>0</sub> – control; P<sub>1</sub> – 8.7; P<sub>2</sub> – 17.4 and P<sub>3</sub> – 26.2 kg ha<sup>-1</sup> of P (17%; 33% and 67% of total P uptake for grain yield = 9.0 t ha<sup>-1</sup>). The N rates were as follows: N<sub>0</sub> – control; N<sub>1</sub> – 60; N<sub>2</sub> – 120 and N<sub>3</sub> – 180 kg ha<sup>-1</sup> of N. A nitrogen rate 180 kg N ha<sup>-1</sup> corresponded to 100% of maize requirement for this nutrient in mineral fertilizers. The effect of mineral fertilization with NPS was compared to the absolute control (AC), without fertilization with these components. NPS were applied to the soil using fertilizer NPS(+Zn) in the proportion 20-20-35+0.3 (calculated for N, P<sub>2</sub>O<sub>5</sub>, SO<sub>3</sub>, Zn). The fertilizer is based on two main chemical compounds: di-ammonium phosphate, DAP [(NH<sub>4</sub>)<sub>2</sub>HPO<sub>4</sub>] and ammonium sulfate [(NH<sub>4</sub>)<sub>2</sub>SO<sub>4</sub>]. Therefore, on plots with localized fertilization P<sub>1</sub>, P<sub>2</sub> and P<sub>3</sub>, the doses of ammonium nitrogen (NH<sub>4</sub>-N) were 20; 40 and 60 kg ha<sup>-1</sup> of N, and those of sulfur were 14, 28 and 42 kg ha<sup>-1</sup> of S, respectively. In order to simplify the notation of fertilization treatments, the NPS rates were recorded as P rates. The NPS fertilizer was applied while sowing the seeds. The fertilizer was banded to 5 cm below and away from the seeds. In treatments without NPS fertilization or with low total N rates, maize requirement for N was supplemented with ammonium nitrate (34% N) – broadcast application immediately before sowing. Potassium fertilization was carried out in early spring in the form of potassium salt K(S,Mg) in proportion 41(15,6.5) at the rate of 66.4 kg ha<sup>-1</sup> of K, regardless of the NPS treatment.

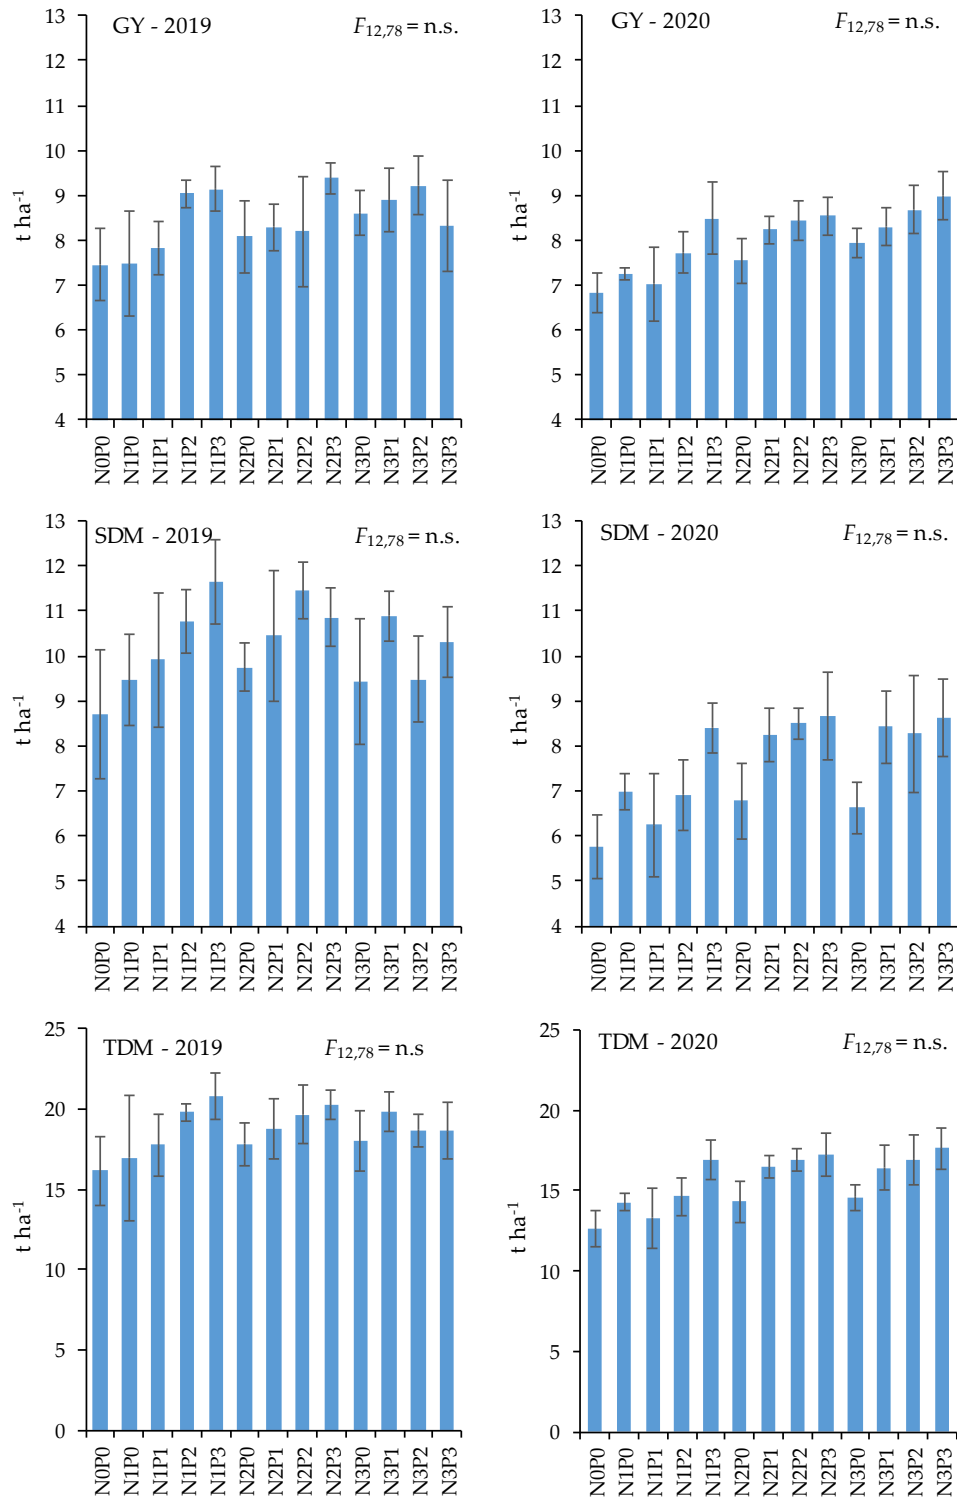

**Figure S1.** Maize grain yield (GY), crop residues biomass (SDM) and total dry matter (TDM) depending on the year (2019-2020) and fertilization treatments. Means within a column followed by the same letter indicate a lack of significant difference between the fertilized treatments (HSD test). Hatched bars represent 2×SEM ranges.

**Table S1.** Maize yield components depending on the year and fertilization treatments.

| Year Treatment                     | Plant density<br>No. ha <sup>-1</sup> | Cob<br>No. plant <sup>-1</sup> | Thousand grain weight,<br>g | No. of grains cob <sup>-1</sup> |
|------------------------------------|---------------------------------------|--------------------------------|-----------------------------|---------------------------------|
| Effect of the year (Y)             |                                       |                                |                             |                                 |
| 2019                               | 74945 ±728                            | 0.99 ±0,01                     | 228.8 ±1,9 <sup>b</sup>     | 517.6 ±11,8 <sup>a</sup>        |
| 2020                               | 75000 ±750                            | 0.99 ±0,01                     | 311.6 ±3,7 <sup>a</sup>     | 447.8 ±7,8 <sup>b</sup>         |
| Effect of the treatment (T)        |                                       |                                |                             |                                 |
| N0P0                               | 78214 ±1663                           | 0.99 ±0,01                     | 245.9 ±11,1 <sup>b</sup>    | 459.2 ±33,1                     |
| N1P0                               | 74881 ±423                            | 0.99 ±0,02                     | 266.6 ±18,1 <sup>ab</sup>   | 447.2 ±39,4                     |
| N1P1                               | 75357 ±674                            | 0.98 ±0,01                     | 252.0 ±15,6 <sup>ab</sup>   | 478.9 ±16,9                     |
| N1P2                               | 74167 ±650                            | 0.99 ±0,01                     | 273.4 ±14,7 <sup>ab</sup>   | 508.0 ±17,7                     |
| N1P3                               | 74167 ±404                            | 1.00 ±0,01                     | 273.7 ±17,5 <sup>ab</sup>   | 499.6 ±29,2                     |
| N2P0                               | 74167 ±826                            | 0.98 ±0,01                     | 262.7 ±14,3 <sup>ab</sup>   | 497.1 ±25,5                     |
| N2P1                               | 75833 ±892                            | 0.99 ±0,02                     | 279.3 ±18,8 <sup>ab</sup>   | 473.0 ±22,3                     |
| N2P2                               | 76310 ±1034                           | 0.98 ±0,01                     | 280.2 ±20,2 <sup>a</sup>    | 464.0 ±25,3                     |
| N2P3                               | 73214 ±1347                           | 1.01 ±0,01                     | 274.3 ±17,0 <sup>ab</sup>   | 509.3 ±34,6                     |
| N3P0                               | 74881 ±2888                           | 1.00 ±0,01                     | 273.3 ±18,8 <sup>ab</sup>   | 474.5 ±37,4                     |
| N3P1                               | 73929 ±461                            | 1.00 ±0,01                     | 280.6 ±17,3 <sup>a</sup>    | 479.2 ±30,4                     |
| N3P2                               | 74643 ±961                            | 0.99 ±0,005                    | 276.8 ±16,3 <sup>ab</sup>   | 494.2 ±35,8                     |
| N3P3                               | 74881 ±424                            | 0.98 ±0,01                     | 274.0 ±20,6 <sup>ab</sup>   | 490.9 ±21,7                     |
| ANOVA results (significance level) |                                       |                                |                             |                                 |
| Year                               | n.s.                                  | n.s.                           | ***                         | ***                             |
| Treatment                          | n.s.                                  | n.s.                           | *                           | n.s.                            |
| Y × T                              | n.s.                                  | n.s.                           | n.s.                        | n.s.                            |

\*\*\*, \*\*, \* significant at  $p < 0.001$ ;  $p < 0.01$ ;  $p < 0.05$ , respectively; n.s. – non significant; means within a column followed by the same letter indicate a lack of significant difference between the fertilized treatments (HSD test).

**Table S2.** Dry matter (DM) at two growth sages (7 leaf and start of lowering), nitrogen concentration in DM; accumulation N in particular plant organs and total N accumulation by maize depending on the year and fertilization treatment

| Treatment | Maize DM,<br>g plant <sup>-1</sup> |           | Nitrogen concentration<br>g kg <sup>-1</sup> DM |           |       |                    | Nitrogen accumulation<br>g ha <sup>-1</sup> |            |       |                    | Total |
|-----------|------------------------------------|-----------|-------------------------------------------------|-----------|-------|--------------------|---------------------------------------------|------------|-------|--------------------|-------|
|           | 7 leaf                             | Flowering | 7 leaf                                          | Flowering | Grain | Crop resi-<br>dues | 7 leaf                                      | Flowe-ring | Grain | Crop resi-<br>dues |       |
|           |                                    |           |                                                 |           |       |                    |                                             |            |       |                    |       |
| Year 2019 |                                    |           |                                                 |           |       |                    |                                             |            |       |                    |       |
| N0P0      | 7.6                                | 81.3      | 37.8                                            | 20.5      | 14.7  | 10.0               | 22.1                                        | 125.2      | 109.9 | 87.4               | 197.3 |
| N1P0      | 8.1                                | 91.3      | 36.6                                            | 26.2      | 16.4  | 11.7               | 22.7                                        | 179.5      | 122.5 | 110.6              | 233.0 |
| N1P1      | 9.5                                | 78.9      | 40.2                                            | 27.7      | 16.9  | 12.4               | 28.6                                        | 163.9      | 132.1 | 123.4              | 255.5 |
| N1P2      | 9.2                                | 93.2      | 41.2                                            | 26.4      | 17.4  | 9.7                | 28.4                                        | 184.4      | 157.0 | 104.4              | 261.4 |
| N1P3      | 9.3                                | 97.3      | 42.2                                            | 25.0      | 17.8  | 12.7               | 29.4                                        | 182.2      | 162.7 | 147.3              | 310.0 |
| N2P0      | 9.8                                | 89.4      | 37.3                                            | 27.6      | 18.0  | 12.8               | 27.8                                        | 185.2      | 145.8 | 124.6              | 270.4 |
| N2P1      | 10.0                               | 89.6      | 40.9                                            | 27.6      | 17.7  | 11.0               | 30.8                                        | 185.5      | 146.5 | 115.0              | 261.4 |
| N2P2      | 8.7                                | 92.1      | 41.0                                            | 26.0      | 18.4  | 12.4               | 27.0                                        | 179.6      | 150.8 | 142.4              | 293.1 |
| N2P3      | 10.2                               | 89.6      | 40.8                                            | 27.1      | 16.8  | 12.6               | 31.3                                        | 182.3      | 157.4 | 136.8              | 294.2 |
| N3P0      | 10.2                               | 93.4      | 39.8                                            | 26.2      | 18.2  | 12.8               | 31.0                                        | 183.6      | 156.9 | 120.8              | 277.6 |
| N3P1      | 11.1                               | 85.5      | 38.4                                            | 24.6      | 18.7  | 10.2               | 32.5                                        | 157.8      | 166.5 | 111.2              | 277.6 |
| N3P2      | 10.5                               | 80.8      | 42.0                                            | 27.3      | 18.0  | 13.4               | 33.1                                        | 165.7      | 165.9 | 126.6              | 292.5 |
| N3P3      | 10.2                               | 95.0      | 41.9                                            | 27.3      | 18.4  | 12.8               | 32.3                                        | 194.4      | 152.7 | 131.8              | 284.5 |
| Year 2020 |                                    |           |                                                 |           |       |                    |                                             |            |       |                    |       |
| N0P0      | 5.7                                | 83.5      | 35.0                                            | 15.4      | 13.8  | 10.5               | 14.9                                        | 96.5       | 94.3  | 60.4               | 154.7 |
| N1P0      | 6.8                                | 99.6      | 39.1                                            | 15.4      | 14.7  | 10.5               | 19.9                                        | 115.0      | 106.6 | 73.6               | 180.3 |
| N1P1      | 6.2                                | 118.7     | 43.0                                            | 17.3      | 15.9  | 10.9               | 20.0                                        | 154.1      | 112.0 | 67.7               | 179.7 |
| N1P2      | 7.8                                | 102.7     | 42.1                                            | 19.3      | 16.3  | 11.0               | 24.5                                        | 148.8      | 125.7 | 76.1               | 201.8 |
| N1P3      | 8.1                                | 127.3     | 42.1                                            | 17.3      | 17.0  | 11.3               | 25.7                                        | 165.2      | 144.1 | 95.3               | 239.4 |
| N2P0      | 6.4                                | 102.2     | 44.5                                            | 18.0      | 15.4  | 12.4               | 21.5                                        | 138.2      | 116.1 | 84.0               | 200.1 |
| N2P1      | 7.0                                | 121.8     | 40.3                                            | 19.4      | 16.3  | 10.1               | 21.2                                        | 177.1      | 134.1 | 83.0               | 217.1 |
| N2P2      | 9.0                                | 123.6     | 43.5                                            | 19.8      | 17.0  | 11.2               | 29.4                                        | 183.3      | 143.0 | 95.2               | 238.2 |
| N2P3      | 7.7                                | 121.3     | 41.2                                            | 16.5      | 16.6  | 11.9               | 23.9                                        | 149.6      | 142.1 | 102.9              | 245.0 |
| N3P0      | 6.5                                | 113.4     | 45.6                                            | 18.0      | 17.0  | 11.0               | 22.3                                        | 153.5      | 134.9 | 72.8               | 207.7 |
| N3P1      | 6.1                                | 118.3     | 44.1                                            | 18.4      | 16.5  | 11.3               | 20.1                                        | 162.8      | 136.4 | 95.1               | 231.5 |
| N3P2      | 8.6                                | 131.1     | 42.5                                            | 19.8      | 17.5  | 12.6               | 27.5                                        | 195.1      | 152.0 | 104.2              | 256.1 |
| N3P3      | 7.4                                | 125.6     | 43.9                                            | 19.7      | 18.7  | 11.5               | 24.5                                        | 186.0      | 168.3 | 99.2               | 267.5 |

**Table S3.** Correlation matrix loadings and variance of the significant principal components (PCs) for grain yield of maize and nitrogen use efficiency (NUE) indices (n = 26)

| Independent variable | Principal components |             |             |
|----------------------|----------------------|-------------|-------------|
|                      | PC1                  | PC2         | PC3         |
| GY                   | 0.66                 | -0.39       | 0.58        |
| SDM                  | <b>0.88</b>          | -0.35       | -0.13       |
| TN                   | <b>0.84</b>          | -0.54       | 0.06        |
| NHI                  | -0.68                | 0.26        | 0.62        |
| PFP                  | 0.35                 | <b>0.90</b> | -0.15       |
| AN                   | 0.58                 | 0.48        | 0.53        |
| PNB                  | 0.46                 | <b>0.86</b> | -0.12       |
| RE                   | <b>0.80</b>          | 0.50        | 0.12        |
| IE                   | <b>-0.77</b>         | 0.54        | 0.26        |
| PE                   | 0.08                 | 0.10        | <b>0.73</b> |
| Ngap                 | -0.22                | -0.92       | 0.25        |
| Eigenvalue           | 4.3                  | 3.8         | 1.7         |
| Variance. %          | 39.4                 | 34.6        | 15.9        |
| Cumulative. %        | 39.4                 | 74.0        | 89.9        |

Boldfaced loadings are > 0.70. Key: GY – grain yield; SDM – crop residues (straw) biomass; TN – total N accumulation; NHI – N harvest index; PFP - partial factor productivity of N; AE - agronomic efficiency of N; PNB - partial N balance; RE – apparent N recovery efficiency; IE – internal N utilization efficiency; N<sub>gap</sub> – N gap.

**Table S4.** Pearson correlation matrix between maize grain yield (GY), crop residues dry matter (SDM), total nitrogen accumulation (TN) and nitrogen use indices (n = 26)

| Traits | GY      | SDM      | TN       | NHI     | PFP      | AN      | PNB      | RE      | IE    | PE   |
|--------|---------|----------|----------|---------|----------|---------|----------|---------|-------|------|
| SDM    | 0.63**  |          |          |         |          |         |          |         |       |      |
| TN     | 0.80*** | 0.90***  |          |         |          |         |          |         |       |      |
| NHI    | -0.16   | -0.74*** | -0.65*   |         |          |         |          |         |       |      |
| PFP    | -0.22   | 0.05     | -0.19    | -0.10   |          |         |          |         |       |      |
| AN     | 0.56**  | 0.24     | 0.25     | 0.09    | 0.51*    |         |          |         |       |      |
| PNB    | -0.12   | 0.15     | -0.07    | -0.15   | 0.99***  | 0.57**  |          |         |       |      |
| RE     | 0.39    | 0.46*    | 0.41*    | -0.34   | 0.69***  | 0.82*** | 0.76***  |         |       |      |
| IE     | -0.52** | -0.89*** | -0.92*** | 0.81*** | 0.16     | -0.00   | 0.05     | -0.32   |       |      |
| PE     | 0.30    | 0.00     | 0.06     | 0.31    | 0.06     | 0.25    | 0.09     | 0.14    | 0.11  |      |
| Ngap   | 0.35    | 0.07     | 0.32     | 0.09    | -0.95*** | -0.42*  | -0.92*** | -0.59** | -0.26 | 0.04 |

\*\*\*, \*\*, \* significant at p < 0.001; p < 0.01; p < 0.05, respectively. Key: GY – grain yield; SDM – crop residues (straw) biomass; TN – total N accumulation; NHI – N harvest index; PFP - partial factor productivity of N; AE - agronomic efficiency of N; PNB - partial N balance; RE – apparent N recovery efficiency; IE – internal N utilization efficiency; N<sub>gap</sub> – N gap.

**Table S5.** Dry matter and nitrogen management indices depending on fertilization treatment (mean for two years).

| Treatment | Dry matter management indices |             |             |             | Nitrogen management indices |            |            |            |
|-----------|-------------------------------|-------------|-------------|-------------|-----------------------------|------------|------------|------------|
|           | DMA                           | DMR         | DMRE        | CDMR        | NA                          | NR         | NRE        | CNR        |
| N0P0      | 102.5 ±15.1                   | -10.3 ±10.4 | -11.9 ±12.4 | -8.2 ±10.5  | 0.78 ±0.14                  | 0.53 ±0.08 | 36.5 ±5.2  | 43.3 ±8.6  |
| N1P0      | 112.2 ±25.0                   | -14.1 ±18.6 | -16.5 ±19.9 | -5.7 ±17.9  | 0.79 ±0.32                  | 0.74 ±0.21 | 36.8 ±8.1  | 57.9 ±22,3 |
| N1P1      | 106.6 ±22.8                   | -8.1 ±19.2  | -24.2 ±25.9 | -4.3 ±18.6  | 0.76 ±0.28                  | 0.86 ±0.22 | 38.0 ±10.0 | 57.3 ±14,0 |
| N1P2      | 134.9 ±18.8                   | -21.8 ±14.9 | -25.9 ±17.0 | -16.4 ±12.6 | 0.91 ±0.18                  | 1.00 ±0.14 | 44.6 ±4.5  | 53.7 ±7,6  |
| N1P3      | 142.1 ±21.2                   | -23.2 ±16.9 | -27.1 ±17.3 | -16.6 ±13.3 | 1.40 ±0.26                  | 0.67 ±0.17 | 29.0 ±6.9  | 35.4 ±9,2  |
| N2P0      | 120.9 ±16.4                   | -15.8 ±13.1 | -21.8 ±15.1 | -13.4 ±13.3 | 1.02 ±0.19                  | 0.75 ±0.15 | 33.5 ±5.8  | 44.0 ±9,5  |
| N2P1      | 127.0 ±18.2                   | -17.8 ±15.6 | -23.3 ±17.7 | -14.6 ±12.7 | 0.74 ±0.22                  | 1.11 ±0.16 | 45.4 ±5.8  | 62.6 ±10,0 |
| N2P2      | 132.4 ±21.4                   | -23.0 ±15.9 | -31.2 ±19.8 | -19.0 ±12.7 | 1.07 ±0.35                  | 0.86 ±0.22 | 33.2 ±8.5  | 52.3 ±14,8 |
| N2P3      | 151.5 ±18.9                   | -28.5 ±15.2 | -36.7 ±18.7 | -21.4 ±11.9 | 1.49 ±0.18                  | 0.57 ±0.16 | 24.2 ±5.9  | 27.8 ±7,3  |
| N3P0      | 119.0 ±22.6                   | -6.8 ±16.7  | -10.2 ±17.9 | -1.2 ±13.9  | 1.06 ±0.28                  | 0.91 ±0.17 | 41.4 ±7.7  | 50.6 ±10,6 |
| N3P1      | 145.2 ±16.9                   | -28.9 ±16.0 | -38.8 ±20.9 | -22.7 ±12.5 | 1.31 ±0.25                  | 0.74 ±0.16 | 32.8 ±6.6  | 38.9 ±8,8  |
| N3P2      | 133.3 ±19.3                   | -13.5 ±17.2 | -22.9 ±17.6 | -10.0 ±15.4 | 1.28 ±0.26                  | 0.85 ±0.21 | 33.7 ±7.6  | 41.6 ±11,7 |
| N3P3      | 131.5 ±15.4                   | -16.1 ±12.5 | -22.4 ±15.8 | -13.8 ±10.7 | 1.15 ±0.25                  | 0.99 ±0.17 | 37.4 ±6.1  | 48.3 ±9,8  |

DMI – dry matter increase ; DMR – dry matter remobilization; NI – nitrogen increase; NR – nitrogen remobilization; DMRE – dry matter remobilization efficiency; CDMR – contribution of DMR assimilates to grain; NRE – N remobilization efficiency; CNR – contribution of remobilized N to grain N content.

**Table S6.** Correlation matrix loadings and variance of the significant principal components (PCs) for grain yield of maize and dry matter and nitrogen management indices (n = 26)

| Independent variable | Principal components |             |       |
|----------------------|----------------------|-------------|-------|
|                      | PC1                  | PC2         | PC3   |
| GY                   | 0.68                 | 0.57        | -0.32 |
| SDM                  | <b>0.93</b>          | 0.11        | 0.08  |
| TN                   | <b>0.90</b>          | 0.37        | -0.09 |
| DM2                  | -0.56                | <b>0.76</b> | -0.13 |
| Nc2                  | <b>0.91</b>          | -0.02       | 0.36  |
| Na2                  | 0.58                 | <b>0.71</b> | 0.34  |
| DMRE                 | <b>-0.94</b>         | 0.27        | -0.10 |
| CDMR                 | <b>-0.94</b>         | 0.29        | -0.07 |
| NRE                  | <b>-0.81</b>         | 0.38        | 0.33  |
| CNR                  | -0.63                | 0.34        | 0.69  |
| DM1                  | <b>0.92</b>          | 0.11        | 0.10  |
| Nc1                  | -0.18                | <b>0.77</b> | -0.32 |
| Na1                  | <b>0.88</b>          | 0.32        | 0.01  |
| Eigenvalue           | 8.1                  | 2.7         | 1.1   |
| Variance. %          | 62.3                 | 20.6        | 8.4   |
| Cumulative. %        | 62.3                 | 82.9        | 91.3  |

Boldfaced loadings are > 0.70. Key: GY – grain yield; SDM – crop residues (straw) biomass; TN – total N accumulation; DM1 – dry matter of plant at 7 leaf growth stage; Nc1 – N concentration at 7 leaf growth stage; Na1 – N accumulation at 7 leaf growth stage; DM2 – dry matter of plant at flowering; Nc2 – N concentration at flowering; Na2 – N accumulation at flowering; DMRE – dry matter remobilization efficiency; CDMR – contribution of DMR assimilates to grain; NRE – N remobilization efficiency; CNR – contribution of remobilized N to grain N content.

**Table S7.** Pearson correlation matrix between maize grain yield (GY), crop residues dry matter (SDM), total nitrogen accumulation (TN) and nitrogen content at early growth stages and N remobilization and contribution to grain (n = 26)

| Traits | GY      | SDM      | TN       | DM1      | Nc1    | Na1      | DM2     | Nc2      | Na2   | DMRE    | CDMR    | NRE     |
|--------|---------|----------|----------|----------|--------|----------|---------|----------|-------|---------|---------|---------|
| SDM    | 0.68*** |          |          |          |        |          |         |          |       |         |         |         |
| TN     | 0.85*** | 0.90***  |          |          |        |          |         |          |       |         |         |         |
| DM1    | 0.66*** | 0.81***  | 0.83***  |          |        |          |         |          |       |         |         |         |
| Nc1    | 0.32    | -0.13    | 0.12     | -0.16    |        |          |         |          |       |         |         |         |
| Na1    | 0.75*** | 0.78***  | 0.87***  | 0.96***  | 0.11   |          |         |          |       |         |         |         |
| DM2    | 0.10    | -0.40*   | -0.19    | -0.44*   | 0.61** | -0.29    |         |          |       |         |         |         |
| Nc2    | 0.47*   | 0.84***  | 0.78***  | 0.84***  | -0.22  | 0.79***  | -0.62** |          |       |         |         |         |
| Na2    | 0.68*** | 0.65***  | 0.78***  | 0.61**   | 0.31   | 0.69***  | 0.20    | 0.64***  |       |         |         |         |
| DMRE   | -0.45*  | -0.88*** | -0.73*** | -0.82*** | 0.36   | -0.72*** | 0.76*** | -0.90*** | -0.38 |         |         |         |
| CDMR   | -0.46*  | -0.89*** | -0.73*** | -0.80*** | 0.38   | -0.70*** | 0.77*** | -0.89*** | -0.36 | 0.99*** |         |         |
| NRE    | -0.38   | -0.71*** | -0.65*** | -0.64*** | 0.32   | -0.55**  | 0.67*** | -0.63**  | -0.12 | 0.83*** | 0.84*** |         |
| CNR    | -0.46*  | -0.47*   | -0.51**  | -0.49*   | 0.18   | -0.44*   | 0.51*   | -0.33    | 0.10  | 0.60**  | 0.63**  | 0.85*** |

\*\*\*, \*\*, \* significant at  $p < 0.001$ ;  $p < 0.01$ ;  $p < 0.05$ , respectively. Key: GY – grain yield; SDM – crop residues (straw) biomass; TN – total N accumulation; DM1 – dry matter of plant at 7 leaf growth stage; Nc1 – N concentration at 7 leaf growth stage; Na1 - N accumulation at 7 leaf growth stage; DM2 – dry matter of plant at flowering; Nc2 – N concentration at flowering; Na1 - N accumulation at flowering; DMRE – dry matter remobilization efficiency; CDMR – contribution of DMR assimilates to grain; NRE – N remobilization efficiency; CNR – contribution of remobilized N to grain N content.
